# Supplementary material for: Assessing the sustainability of yellow anaconda (Eunectes notaeus) harvest in northeastern Argentina
Source: Research Square preprint supplement (doi:10.21203/rs.3.rs-109402/v1), 2020-11-20
Supplement: Supplementary file 1 [file d716cb1902b1b27ee2221308.docx]

**Supplementary information**

**Assessing the sustainability of yellow anaconda (*Eunectes notaeus*) harvest in northeastern Argentina**

Bruno F. Camera*, Christine Strüssmann, Itxaso Quintana, Tomás Waller, Mariano Barros, Juan Draque, Patrício A. Micucci, Everton B. P. Miranda

Programa de Pós-graduação em Zoologia, Instituto de Biociências, Universidade Federal de Mato Grosso, Cuiabá, Mato Grosso, Brazil

B. F. C., C. S., I. Q., and E. B. P. de M. conceived and designed the experiments, and wrote the paper. T. W., M. B., J. D., and P. A. M. provided data, revised, and made improvements to the paper.

*Contact information: Bruno Felipe Camera

E-mail address: [camera_bruno@hotmail.com](mailto:camera_bruno@hotmail.com)


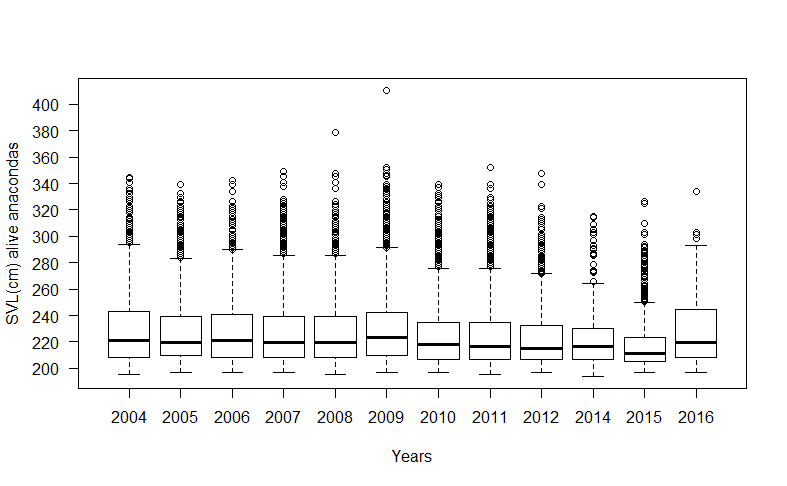


**Supplementary figure S1.**

**Estimated snout-vent length of yellow anacondas harvested by the *Programa Curiyú* in 2004-2016 in northeastern Argentina.**
